# Supplementary figures and images for: Identification of relevant regions on structural and nonstructural proteins of Zika virus for vaccine and diagnostic test development: an in silico approach
Source: PubMed Central journal article supplement — New Microbes New Infect. 2019 Jan 31;29:100506. doi: 10.1016/j.nmni.2019.01.002 (PMC6396434; doi:10.1016/j.nmni.2019.01.002), 2019-01-31

## Supplementary Figure

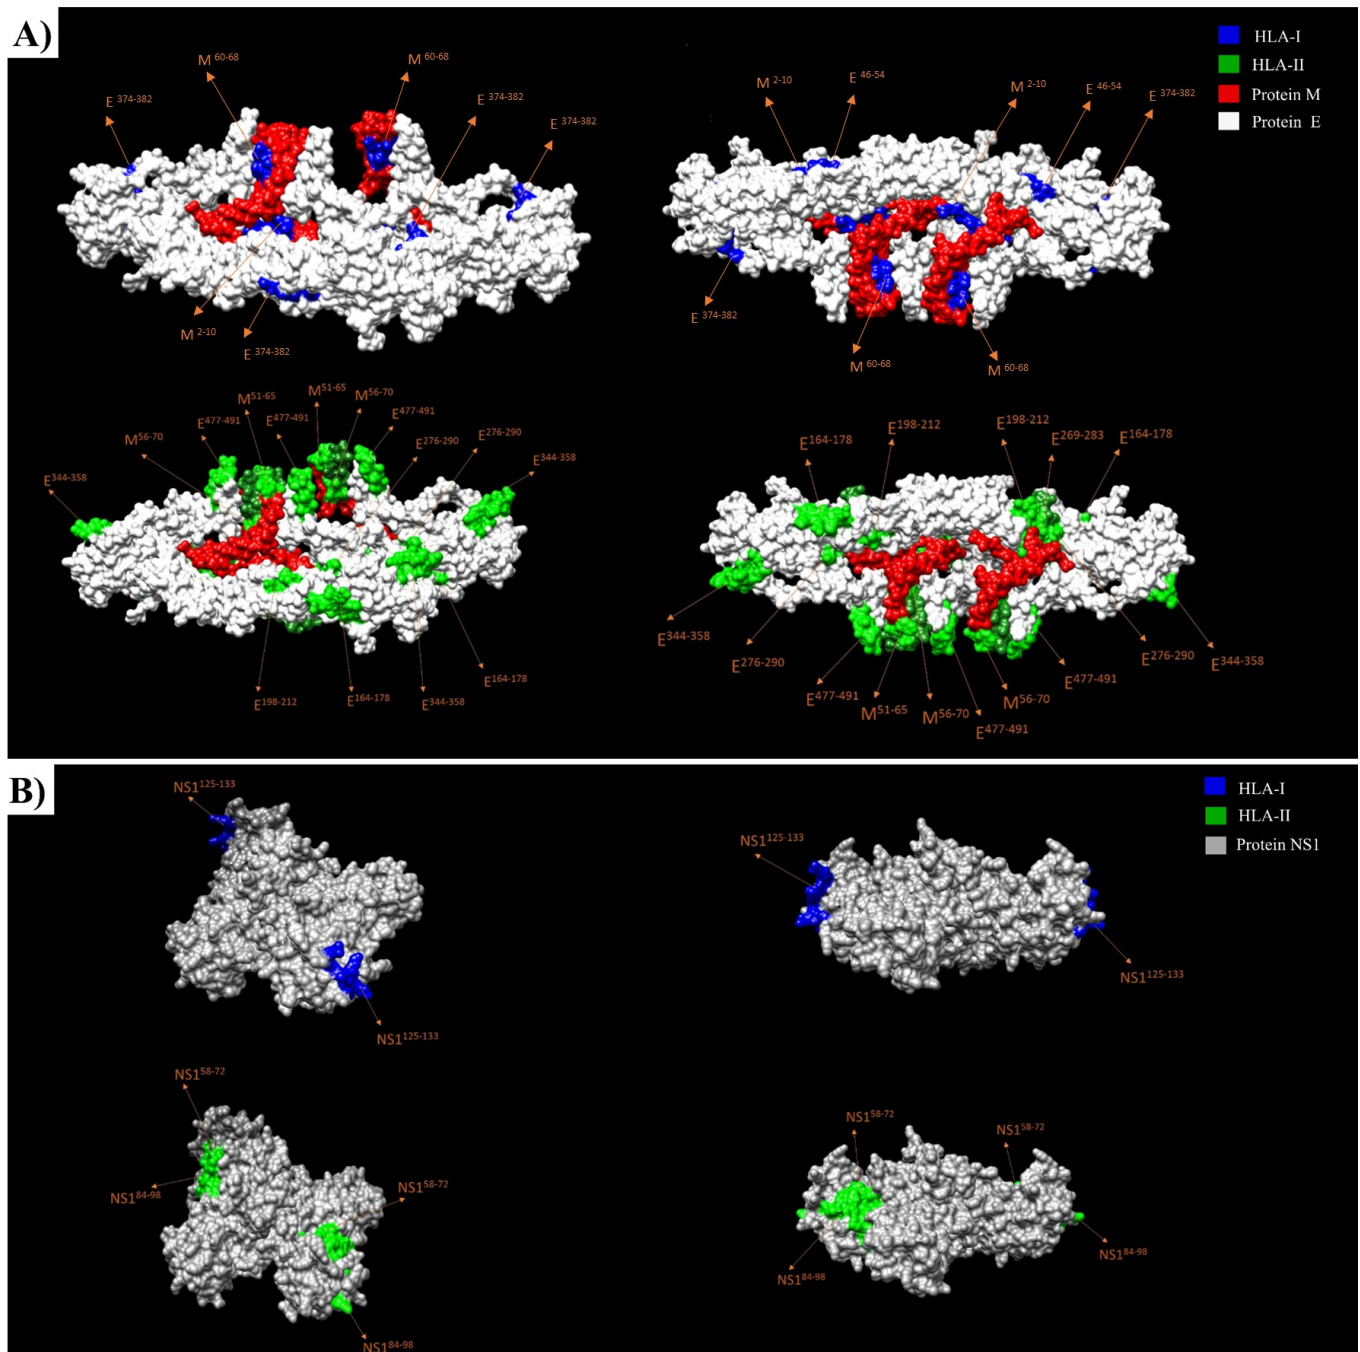

Supplement: mmc1.pdf [file mmc1.pdf]
